# Supplementary material for: MeT-DB V2.0: elucidating context-specific functions of N6-methyl-adenosine methyltranscriptome
Source: PubMed Central journal article supplement — Nucleic Acids Res. 2017 Nov 8;46(Database issue):D281–7. doi: 10.1093/nar/gkx1080 (PMC5753212; doi:10.1093/nar/gkx1080), 2017-11-08
Supplement: gkx1080_supp.pdf [file gkx1080_supp.pdf]

## Supplementary Material

### MeT-DB V2.0: Elucidating context-specific functions of N<sup>6</sup>-methyl-adenosine methyltranscriptome

Hui Liu<sup>1,#</sup>, Huaizhi Wang<sup>1,#</sup>, Zhen Wei<sup>2,#</sup>, Songyao Zhang<sup>3,4</sup>, Gang Hua<sup>1</sup>, Shao-Wu Zhang<sup>4</sup>, Lin Zhang<sup>1</sup>, Shou-Jiang Gao<sup>5</sup>, Jia Meng<sup>2,\*</sup>, Xing Chen<sup>1,\*</sup>, and Yufei Huang<sup>3,6,\*</sup>

<sup>1</sup> School of Information and Control Engineering, China University of Mining and Technology, Xuzhou, Jiangsu 221116, China

<sup>2</sup> Department of Biological Sciences, Xi'an Jiaotong-Liverpool University, Suzhou, Jiangsu 215123, China

<sup>3</sup> Department of Electrical and Computer Engineering, the University of Texas at San Antonio, San Antonio, Texas, 78249, USA

<sup>4</sup> Key Laboratory of Information Fusion Technology of Ministry of Education, School of Automation, Northwestern Polytechnical University, Xi'an, 710072, China

<sup>5</sup> Department of Molecular Microbiology and Immunology, Keck School of Medicine, University of Southern California, Los Angeles, CA, 90033, USA

<sup>6</sup> Department of Epidemiology and Biostatistics, the University of Texas Health at San Antonio, San Antonio, Texas, 78229, USA

\* To whom correspondence should be addressed:

Tel: +1-210-4586270; Fax: +1-210-4585947; Email: yufei.huang@utsa.edu (Y.H.)

Correspondence may also be addressed to:

Tel: +86-516-83590818; Email: xingchen@cumt.edu.cn (X.C.)

Tel: +86-512-81880492; Email: jia.meng@xjtlu.edu.cn (J.M.)

#### Table of Contents

Figure S1. The number of MeRIP-seq samples by years

Figure S2. Illustration of m<sup>6</sup>A readers, writers, and erasers in the TREW database

Figure S3. Distribution of MeRIP-seq samples by species and published papers

Figure S4. Illustration of table view

Table S1. Studies from which the MeT-DB V2.0 core data samples were obtained

Table S2. Studies from which the TREW data samples were obtained

---

# The authors wish it to be known that, in their opinion, the first 3 authors should be regarded as joint First Authors

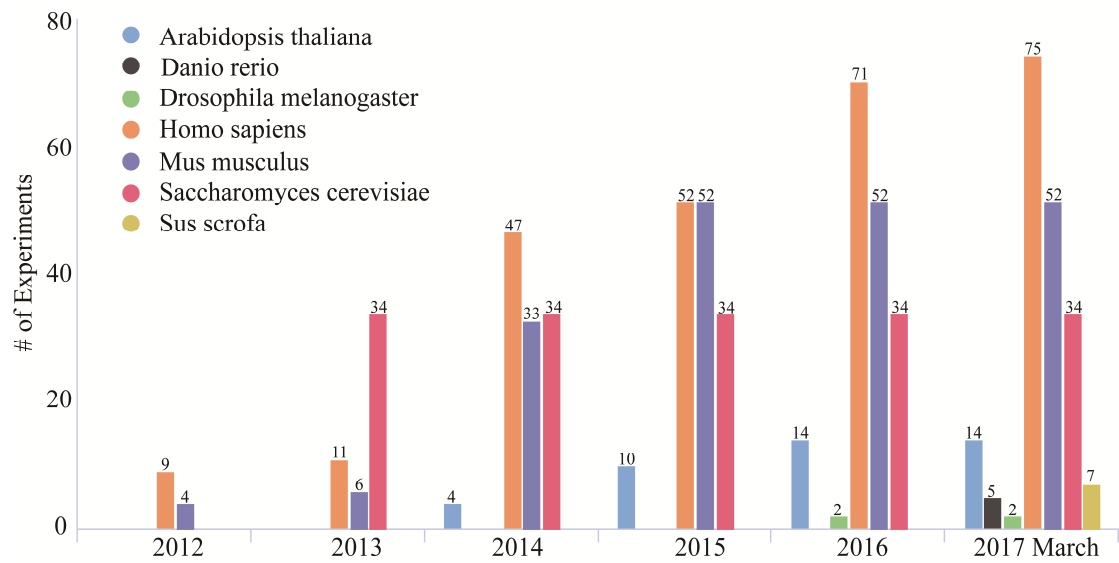

**Figure S1. The number of MeRIP-seq samples by years.** Published studies employed MeRIP-Seq experiments grew rapidly, while more and more species were enrolled.

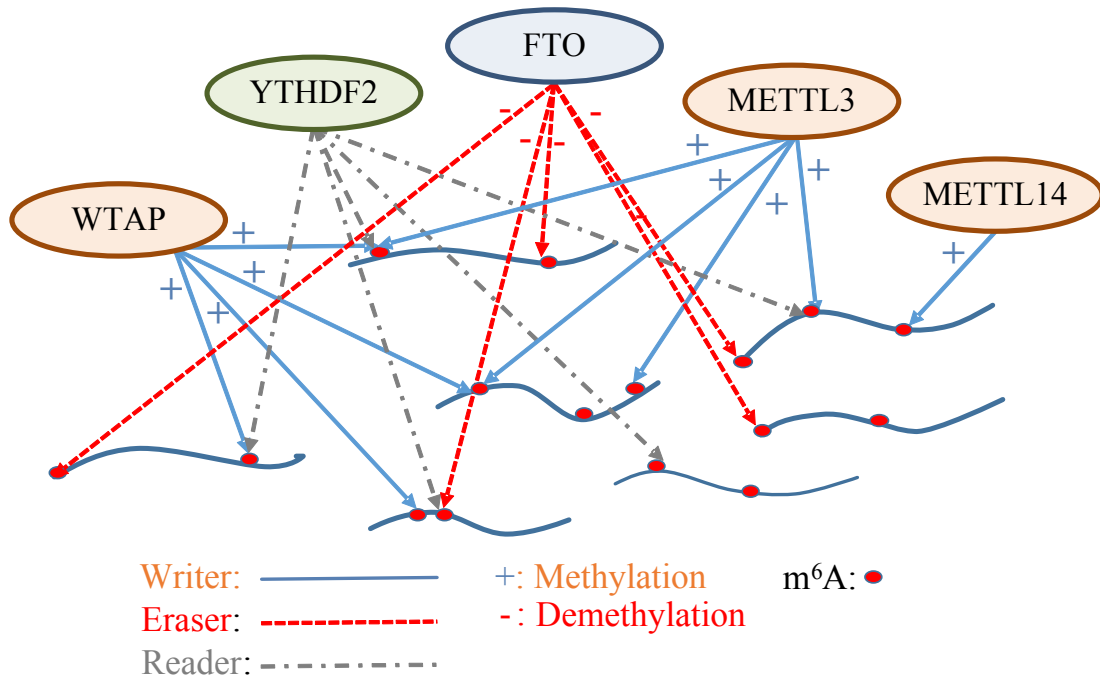

**Figure S2. Illustration of m<sup>6</sup>A readers, writers, and erasers in the TREW database.** TREW is an acronym for the epitranscriptomic Target of Reader, Eraser and Writer. TREW collected ParCLIP-seq and MeRIP-seq samples for 8 regulator/reader proteins (including FTO, KIAA1429, METTL14, METTL3, WTAP, HNRNPC, YTHDC1, YTHDF1) from 10 published studies.

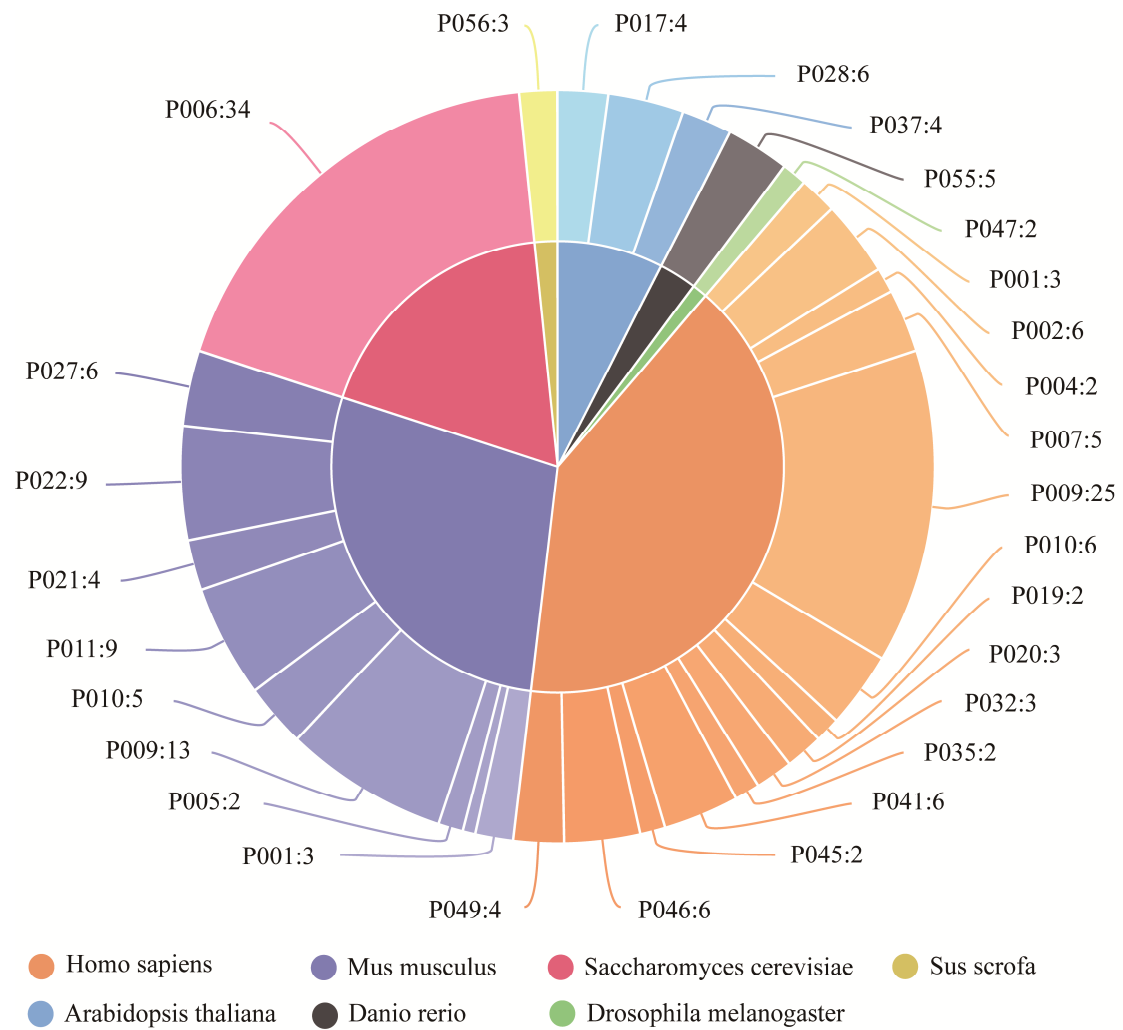

**Figure S3. Distribution of MeRIP-seq samples by species and published papers.** 26 independent studies and 185 MeRIP-Seq experiments were included in MeT-DB V2.0.

**Advanced Functions**

Tools: Export Data Content

Copy | CSV

**Filter SET\_1: Sites Within Genome Region**

Chromosome:  Strand:  Start:  End:

**Filter SET\_2: Sites' Score and Significance**

Fold Enrichment:   P-Value:   FDR:

**Filter SET\_3: Sites Overlapping with Genome Features**

Gene Symbol, Gene ID or RefSeq Accession:  5' UTR:  CDS:  3' UTR:  lncRNA:

**Filter SET\_4: Sites Overlapping with Relative Data**

# HiT mRNA Peaks:   # HiT Single Data mRNAs:   # HiT TREW Sites:   # HiT SNPs:

# HiT miRNA TargetScan Sites:   # HiT miRNA miRanda Sites:   # HiT Splicing Factor:   # HiT RBP:

# HiT Cancer Gene:   # HiT miRtarbase Gene:   # HiT Tumor Suppressor Genes:

Apply Filters | Reset All Filters | Clear Filter Set\_1 | Clear Filter Set\_2 | Clear Filter Set\_3 | Clear Filter Set\_4

**Genomic features**

Search:

| show | id | Chrom | ChromStart | ChromEnd | Name                    | Score | Strand | Pval               | Fdr                | Fold_enrichment | Gene_name  | HiT_mRNA_sites | HiT_SB_mRNA | HiT_TREW | HiT_SNP | HiT_TargetScan | HiT_miRanda | HiT_splicing_factor | HiT_RBP | HiT_CancerGene | HiT_miRtarbase | HiT_TsGene |   |
|------|----|-------|------------|----------|-------------------------|-------|--------|--------------------|--------------------|-----------------|------------|----------------|-------------|----------|---------|----------------|-------------|---------------------|---------|----------------|----------------|------------|---|
|      | 1  | chr1  | 776810     | 77700    | p001_HEK293T_S1_SVSY_1  | 13    | -      | 0.0001413          | 0.0007763          | 12.8            | :LINC01128 | 12             | 4           | 0        | 0       | 0              | 0           | 0                   | 0       | 0              | 0              | 0          | 0 |
|      | 2  | chr1  | 777709     | 778009   | p001_HEK293T_S1_SVSY_2  | 8     | +      | 0.0004467          | 0.002344           | 7.96            | :LINC01128 | 26             | 5           | 0        | 0       | 0              | 0           | 0                   | 0       | 0              | 0              | 0          | 0 |
|      | 3  | chr1  | 788860     | 789970   | p001_HEK293T_S1_SVSY_3  | 17    | +      | 5.012e-29          | 7.943e-28          | 16.9            | :LINC01128 | 102            | 32          | 1        | 0       | 0              | 63          | 0                   | 0       | 0              | 0              | 0          | 0 |
|      | 4  | chr1  | 791688     | 792468   | p001_HEK293T_S1_SVSY_4  | 28    | -      | 0.000000007244     | 0.00000006406      | 27.4            | :LINC01128 | 81             | 17          | 1        | 0       | 0              | 33          | 0                   | 0       | 0              | 0              | 0          | 0 |
|      | 5  | chr1  | 792811     | 793988   | p001_HEK293T_S1_SVSY_5  | 12    | +      | 0.00009491         | 0.0003651          | 12              | :LINC01128 | 24             | 3           | 0        | 0       | 0              | 13          | 0                   | 0       | 0              | 0              | 0          | 0 |
|      | 6  | chr1  | 878131     | 878491   | p001_HEK293T_S1_SVSY_6  | 5     | +      | 3.881e-36          | 6.31e-34           | 4.66            | :SAMD11    | 35             | 4           | 2        | 0       | 0              | 0           | 0                   | 20      | 2              | 0              | 0          | 0 |
|      | 7  | chr1  | 878452     | 878941   | p001_HEK293T_S1_SVSY_7  | 5     | -      | 5.012e-95          | 2.512e-93          | 4.02            | :SAMD11    | 41             | 7           | 1        | 0       | 0              | 21          | 0                   | 74      | 2              | 0              | 0          | 0 |
|      | 8  | chr1  | 948484     | 948981   | p001_HEK293T_S1_SVSY_8  | 7     | +      | 2.512e-19          | 2.512e-18          | 6.65            | :ISG15     | 27             | 5           | 3        | 0       | 0              | 0           | 0                   | 7       | 2              | 0              | 1          | 0 |
|      | 9  | chr1  | 990362     | 991021   | p001_HEK293T_S1_SVSY_9  | 11    | -      | 1.966e-34          | 3.162e-33          | 10.1            | :AGRN      | 60             | 6           | 2        | 0       | 5              | 26          | 0                   | 88      | 7              | 0              | 0          | 0 |
|      | 10 | chr1  | 1167825    | 1168996  | p001_HEK293T_S1_SVSY_10 | 9     | +      | 2.512e-44          | 5.012e-43          | 8.34            | :B3GALT6   | 73             | 4           | 3        | 0       | 0              | 0           | 0                   | 59      | 0              | 0              | 0          | 0 |
|      | 11 | chr1  | 1168934    | 1169618  | p001_HEK293T_S1_SVSY_11 | 12    | +      | 1e-104             | 1e-102             | 11.5            | :B3GALT6   | 74             | 12          | 1        | 0       | 1              | 47          | 0                   | 94      | 0              | 0              | 0          | 0 |
|      | 12 | chr1  | 1169825    | 1170420  | p001_HEK293T_S1_SVSY_12 | 10    | +      | 7.943e-07          | 2.512e-05          | 9.8             | :B3GALT6   | 65             | 13          | 1        | 0       | 0              | 20          | 0                   | 30      | 0              | 0              | 0          | 0 |
|      | 13 | chr1  | 1248878    | 1247057  | p001_HEK293T_S1_SVSY_13 | 4     | +      | 1.259e-18          | 1.259e-17          | 3.7             | :PUSL1     | 27             | 4           | 2        | 0       | 0              | 8           | 0                   | 30      | 0              | 0              | 0          | 0 |
|      | 14 | chr1  | 1263031    | 1263476  | p001_HEK293T_S1_SVSY_14 | 10    | +      | 5.012e-36          | 7.043e-34          | 9.46            | :CPTP      | 61             | 5           | 3        | 0       | 0              | 7           | 0                   | 14      | 4              | 0              | 0          | 0 |
|      | 15 | chr1  | 1263564    | 1264276  | p001_HEK293T_S1_SVSY_15 | 8     | -      | 0.31e-27           | 7.943e-26          | 7.25            | :CPTP      | 64             | 14          | 2        | 0       | 0              | 18          | 0                   | 62      | 4              | 0              | 0          | 0 |
|      | 16 | chr1  | 1335943    | 1336834  | p001_HEK293T_S1_SVSY_16 | 14    | +      | 1e-154             | 1e-152             | 13.7            | :LOC148413 | 74             | 15          | 3        | 0       | 0              | 187         | 0                   | 36      | 0              | 0              | 0          | 0 |
|      | 17 | chr1  | 1337150    | 1337426  | p001_HEK293T_S1_SVSY_17 | 6     | -      | 5.012e-36          | 7.043e-35          | 4.40            | :LOC148413 | 45             | 6           | 1        | 0       | 0              | 32          | 0                   | 21      | 0              | 0              | 0          | 0 |
|      | 18 | chr1  | 1374529    | 1374789  | p001_HEK293T_S1_SVSY_18 | 8     | +      | 1.999e-19          | 1.999e-18          | 5.51            | :VWA1      | 39             | 4           | 0        | 0       | 1              | 0           | 0                   | 0       | 30             | 0              | 0          | 0 |
|      | 19 | chr1  | 1376365    | 1376683  | p001_HEK293T_S1_SVSY_19 | 8     | +      | 1e-28              | 1.760e-28          | 7.18            | :VWA1      | 54             | 10          | 1        | 0       | 0              | 11          | 0                   | 7       | 10             | 0              | 0          | 0 |
|      | 20 | chr1  | 1550854    | 1551205  | p001_HEK293T_S1_SVSY_20 | 4     | +      | 0.000001947        | 0.000007991        | 3.43            | :MIR2      | 28             | 0           | 0        | 0       | 0              | 0           | 0                   | 2       | 12             | 0              | 0          | 0 |
|      | 21 | chr1  | 1554580    | 1555009  | p001_HEK293T_S1_SVSY_21 | 4     | +      | 0.0001175          | 0.0006457          | 3.32            | :MIR2      | 26             | 4           | 0        | 0       | 0              | 0           | 0                   | 4       | 12             | 0              | 0          | 0 |
|      | 22 | chr1  | 2116073    | 2116834  | p001_HEK293T_S1_SVSY_22 | 5     | +      | 6.31e-24           | 7.043e-23          | 4.72            | :PRKCE2    | 60             | 6           | 1        | 0       | 0              | 34          | 0                   | 19      | 0              | 0              | 0          | 0 |
|      | 23 | chr1  | 2160462    | 2160542  | p001_HEK293T_S1_SVSY_23 | 3     | +      | 0.00002754         | 0.0003226          | 2.89            | :SKI       | 29             | 2           | 1        | 0       | 0              | 0           | 0                   | 42      | 193            | 0              | 0          | 0 |
|      | 24 | chr1  | 2160790    | 2234422  | p001_HEK293T_S1_SVSY_24 | 12    | +      | 1e-54              | 2.512e-53          | 11.5            | :SKI       | 62             | 2           | 3        | 0       | 0              | 0           | 0                   | 55      | 193            | 0              | 0          | 0 |
|      | 25 | chr1  | 2230305    | 2230904  | p001_HEK293T_S1_SVSY_25 | 15    | -      | 0.0000000000000031 | 0.0000000000000031 | 14.5            | :SKI       | 71             | 8           | 0        | 0       | 0              | 0           | 0                   | 193     | 0              | 0              | 0          | 0 |

Showing 1 to 25 of 1,338,085 entries

Column-wise search (launched by any input)

**Figure S4. Illustration of table view.** Table view is capable of displaying background data clearly and providing several search methods. To be more specific, global search can query input information within entire table. Column specific search, located in the footer of table, can perform search within corresponding column. More important, we designed a variety of advanced search functions for different tables to further assist users to screen out the most valuable elements among the huge information stored in the background database. Users can export data by clicking export buttons under any search conditions for further investigation. Besides, users are able to view detailed information in the genome browser of a specific entry by clicking the genome browser icon at the very left end of each row.

**Table S1. Studies from which the MeT-DB V2.0 core data samples were obtained**

| ID | Papa Abbr | Title                                                                                                                                                                        | Species      | Year |
|----|-----------|------------------------------------------------------------------------------------------------------------------------------------------------------------------------------|--------------|------|
| 1  | p001      | Comprehensive Analysis of mRNA Methylation Reveals Enrichment in 3'UTRs and near Stop Codons                                                                                 | Human, Mouse | 2012 |
| 2  | p002      | Topology of the human and mouse m <sup>6</sup> A RNA methylomes revealed by m <sup>6</sup> A -seq                                                                            | Human, Mouse | 2012 |
| 3  | p004      | RNA-Methylation-Dependent RNA Processing Controls the Speed of the Circadian Clock                                                                                           | Human        | 2013 |
| 4  | p005      | The fat mass and obesity associated gene (Fto) regulates activity of the dopaminergic midbrain circuitry                                                                     | Mouse        | 2013 |
| 5  | p006      | High-Resolution Mapping Reveals a Conserved, Widespread, Dynamic mRNA Methylation Program in Yeast Meiosis                                                                   | Yeast        | 2013 |
| 6  | p007      | N6-methyladenosine-dependent regulation of messenger RNA stability                                                                                                           | Human        | 2014 |
| 7  | p009      | Perturbation of m <sup>6</sup> A writers reveals two distinct classes of mRNA methylation at internal and 5' sites                                                           | Human, Mouse | 2014 |
| 8  | p010      | m <sup>6</sup> A RNA modification controls cell fate transition in mammalian embryonic stem cells                                                                            | Human, Mouse | 2014 |
| 9  | p011      | FTO-dependent demethylation of N6-methyladenosine regulates mRNA splicing and is required for adipogenesis                                                                   | Mouse        | 2014 |
| 10 | p017      | Unique features of the m <sup>6</sup> A methylome in Arabidopsis thaliana                                                                                                    | Thaliana     | 2014 |
| 11 | p019      | N6-methyladenosine marks primary microRNAs for processing                                                                                                                    | Human        | 2015 |
| 12 | p020      | N6-Adenosine Methylation in MiRNAs                                                                                                                                           | Human        | 2015 |
| 13 | p021      | m <sup>6</sup> A RNA methylation is regulated by microRNAs and promotes reprogramming to pluripotency                                                                        | Mouse        | 2015 |
| 14 | p022      | m <sup>6</sup> A mRNA methylation facilitates resolution of naive pluripotency toward differentiation                                                                        | Mouse        | 2015 |
| 15 | p027      | Dynamic m <sup>6</sup> A mRNA methylation directs translational control of heat shock response                                                                               | Mouse        | 2015 |
| 16 | p028      | Transcriptome-wide high-throughput deep m <sup>6</sup> A -seq reveals unique differential m <sup>6</sup> A methylation patterns between three organs in Arabidopsis thaliana | Thaliana     | 2015 |
| 17 | p032      | The m <sup>6</sup> A Methyltransferase METTL3 Promotes Translation in Human Cancer Cells                                                                                     | Human        | 2016 |
| 18 | p035      | Dynamics of the human and viral m <sup>6</sup> A RNA methylomes during HIV-1 infection of T cells                                                                            | Human        | 2016 |
| 19 | p037      | N6-Methyladenosine RNA Modification Regulates Shoot Stem Cell Fate in Arabidopsis                                                                                            | Thaliana     | 2016 |
| 20 | p041      | N6-methyladenosine of HIV-1 RNA regulates viral infection and HIV-1 Gag protein expression                                                                                   | Human        | 2016 |
| 21 | p045      | Dynamics of Human and Viral RNA Methylation during Zika Virus Infection                                                                                                      | Human, Zika  | 2016 |
| 22 | p046      | N6-Methyladenosine in Flaviviridae Viral RNA Genomes Regulates Infection                                                                                                     | Human        | 2016 |
| 23 | p047      | m <sup>6</sup> A modulates neuronal functions and sex determination in Drosophila                                                                                            | Drosophila   | 2016 |
| 24 | p049      | FTO Plays an Oncogenic Role in Acute Myeloid Leukemia as a N 6-Methyladenosine RNA Demethylase                                                                               | Mouse        | 2017 |
| 25 | p055      | Genome-wide mapping of 5-hydroxymethyluracil in the eukaryote parasite Leishmania                                                                                            | Zebrafish    | 2017 |
| 26 | p056      | mRNA N6-methyladenosine methylation of postnatal liver development in pig                                                                                                    | Pig          | 2017 |

**Table S2. Studies from which the TREW data samples were obtained**

| ID | Reference Title                                                                                                    | Species      | Technic             | Regulator Name                | Regulator Type | Year |
|----|--------------------------------------------------------------------------------------------------------------------|--------------|---------------------|-------------------------------|----------------|------|
| 1  | The fat mass and obesity associated gene (Fto) regulates activity of the dopaminergic midbrain circuitry           | Mouse        | MeRIP-seq           | FTO                           | Eraser         | 2013 |
| 3  | Perturbation of m <sup>6</sup> A Writers reveals two distinct classes of mRNA methylation at internal and 5' sites | Human, Mouse | MeRIP-seq           | WTAP,KIAA1429, METTL3,METTL14 | Writer         | 2014 |
| 2  | FTO-dependent demethylation of N6-methyladenosine regulates mRNA splicing and is required for adipogenesis         | Mouse        | MeRIP-seq           | FTO                           | Eraser         | 2014 |
| 4  | A METTL3-METTL14 complex mediates mammalian nuclear RNA N6-adenosine methylation                                   | Human        | MeRIP-seq, PAR-CLIP | WTAP,METTL3, METTL14          | Writer         | 2014 |
| 5  | Dynamic m <sup>6</sup> A mRNA methylation directs translational control of heat shock response                     | Mouse        | MeRIP-seq           | FTO                           | Eraser         | 2015 |
| 6  | m <sup>6</sup> A mRNA methylation facilitates resolution of naive pluripotency toward differentiation              | Mouse        | MeRIP-seq           | METTL3                        | Writer         | 2015 |
| 7  | N6-methyladenosine-dependent RNA structural switches regulate RNA-protein interactions                             | Human        | PAR-CLIP            | METTL3,METTL14, HNRNPC        | Writer         | 2015 |
| 8  | N6-methyladenosine Modulates Messenger RNA Translation Efficiency                                                  | Human        | PAR-CLIP            | YTHDF1                        | Reader         | 2015 |
| 9  | FTO Plays an Oncogenic Role in Acute Myeloid Leukemia as a N6-Methyladenosine RNA Demethylase                      | Human        | MeRIP-seq           | FTO                           | Eraser         | 2016 |
| 10 | Structural basis for selective binding of m <sup>6</sup> A RNA by the YTHDC1 YTH domain                            | Human        | PAR-CLIP            | YTHDC1                        | Reader         | 2016 |
